# Supplementary material for: Chemogenomic profiling in yeast reveals antifungal mode-of-action of polyene macrolactam auroramycin
Source: PubMed Central journal article supplement (PMC6557514; doi:10.1371/journal.pone.0218189), 2019-06-10
Supplement: pone.0218189.s004.pdf [file pone.0218189.s004.pdf]

**A**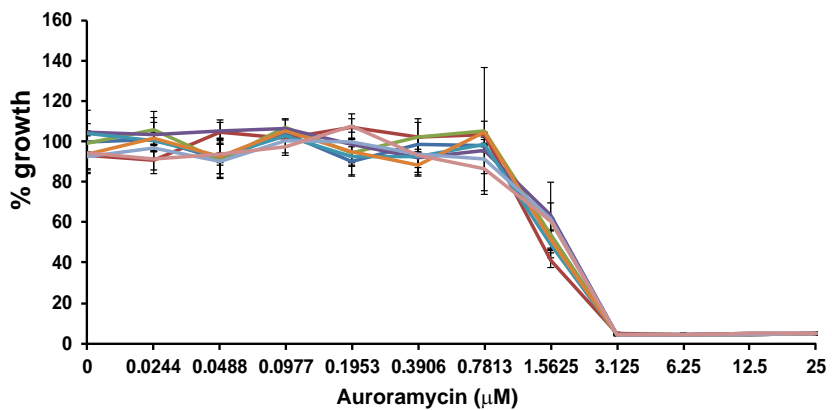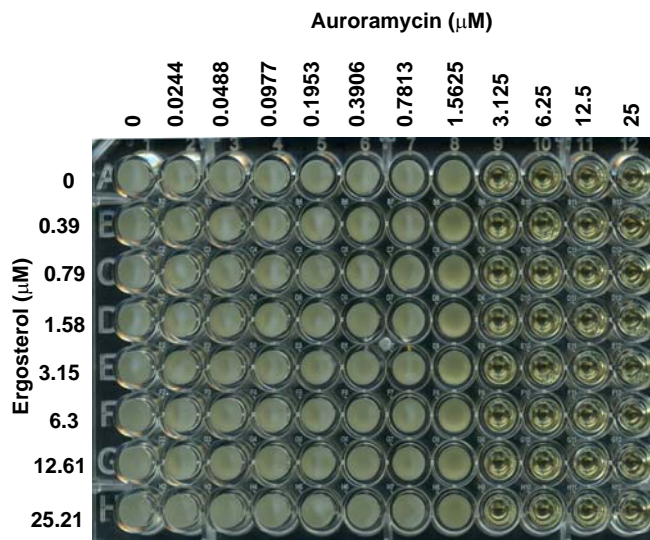**B**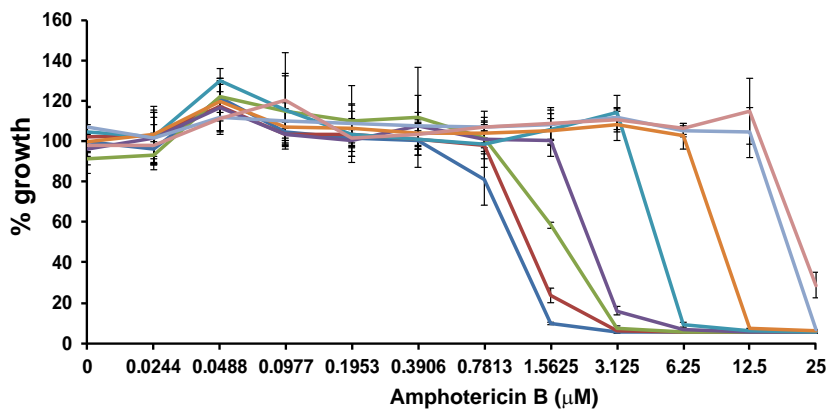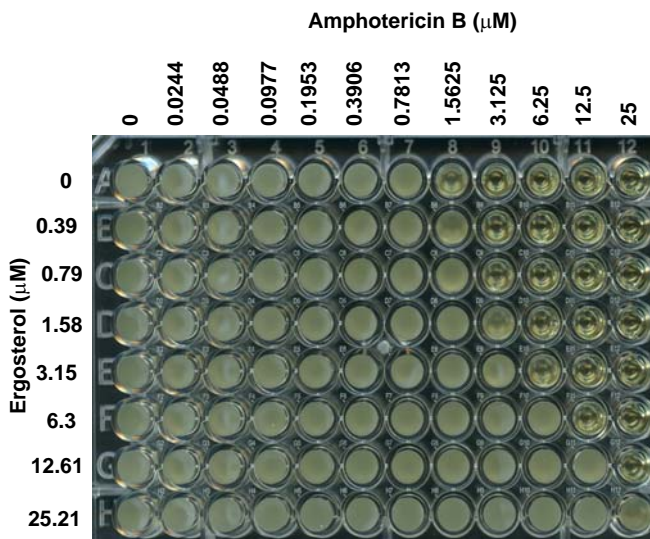**Ergosterol ( $\mu\text{M}$ )**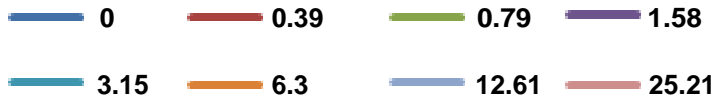**Fig S4**
