# Supplementary material for: Chemogenomic profiling in yeast reveals antifungal mode-of-action of polyene macrolactam auroramycin
Source: PubMed Central journal article supplement (PMC6557514; doi:10.1371/journal.pone.0218189), 2019-06-10
Supplement: pone.0218189.s005.pdf [file pone.0218189.s005.pdf]

**A**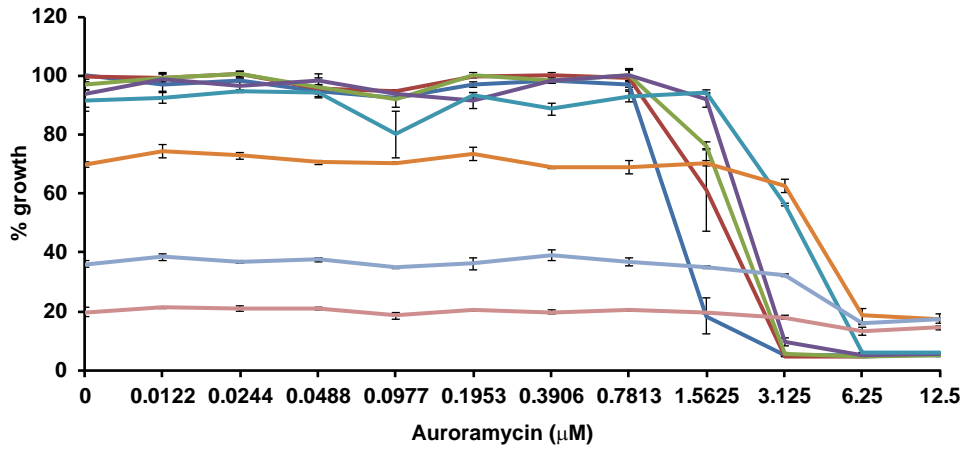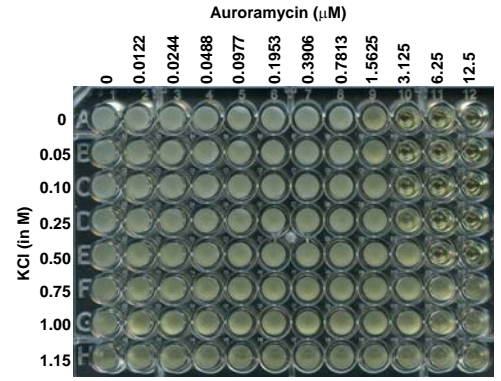

Conc. of KCl

|     |        |        |        |       |        |     |        |
|-----|--------|--------|--------|-------|--------|-----|--------|
| 0 M | 0.05 M | 0.10 M | 0.25 M | 0.5 M | 0.75 M | 1 M | 1.15 M |
|-----|--------|--------|--------|-------|--------|-----|--------|

**B**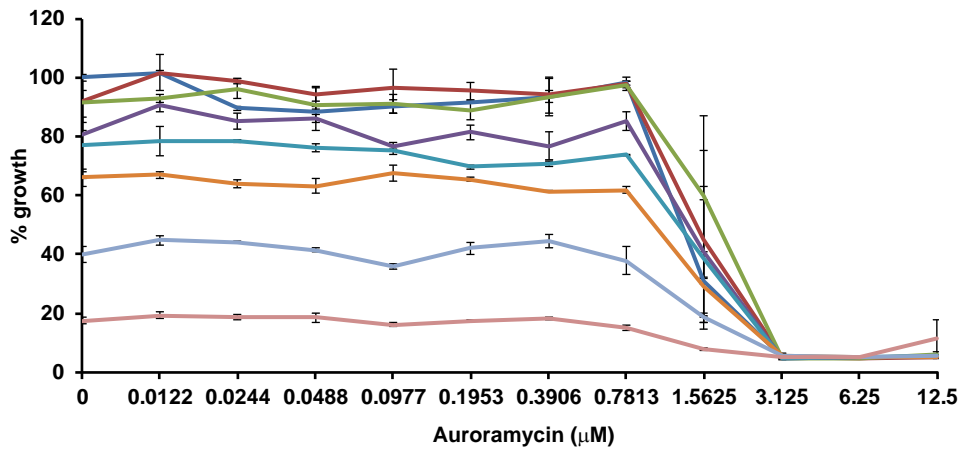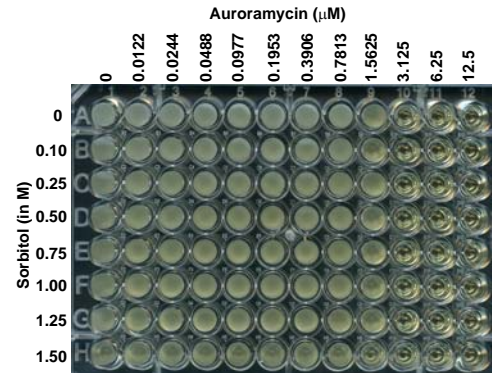

Conc. of Sorbitol

|     |       |        |        |        |     |        |       |
|-----|-------|--------|--------|--------|-----|--------|-------|
| 0 M | 0.1 M | 0.25 M | 0.50 M | 0.75 M | 1 M | 1.25 M | 1.5 M |
|-----|-------|--------|--------|--------|-----|--------|-------|

**Fig S5**
