# Supplementary material for: Chemogenomic profiling in yeast reveals antifungal mode-of-action of polyene macrolactam auroramycin
Source: PubMed Central journal article supplement (PMC6557514; doi:10.1371/journal.pone.0218189), 2019-06-10
Supplement: pone.0218189.s007.pdf [file pone.0218189.s007.pdf]

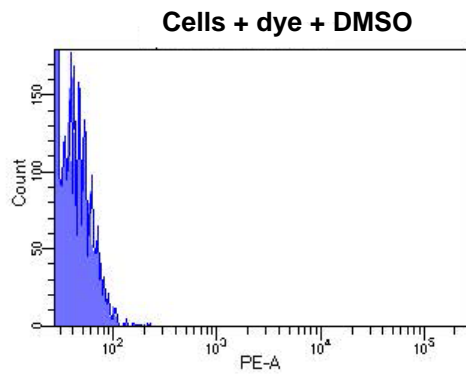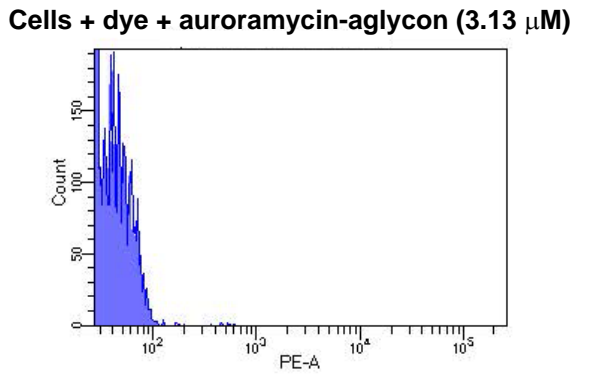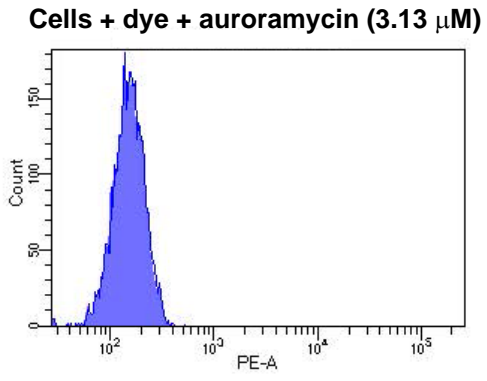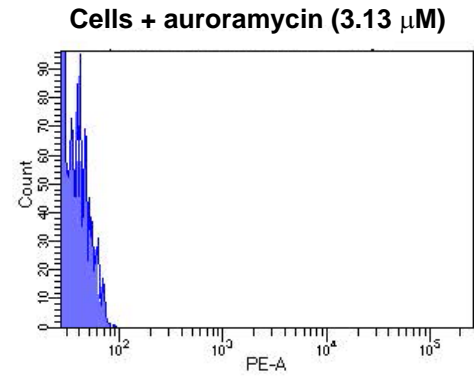

**Fig S7**
